# Supplementary material for: Aspirin and Cardiovascular Risk in Individuals With Elevated Lipoprotein(a): The Multi‐Ethnic Study of Atherosclerosis
Source: PubMed Central journal article supplement — J Am Heart Assoc. 2024 Jan 31;13(3):e033562. doi: 10.1161/JAHA.123.033562 (PMC11056170; doi:10.1161/jaha.123.033562), 2024-01-31
Supplement: JAH3-13-e033562-s001.pdf [file JAH3-13-e033562-s001.pdf]

# **SUPPLEMENTAL MATERIAL**

**Table S1. Association between Aspirin Use and CHD Events, Stratified by Lp(a) Level**

|                    | <b>Lp(a) ≤ 50 mg/dL</b><br>(n=5100) |               |          | <b>Lp(a) &gt; 50 mg/dL</b><br>(n=1261) |               |          |
|--------------------|-------------------------------------|---------------|----------|----------------------------------------|---------------|----------|
| <b>CHD Events</b>  | 373                                 |               |          | 116                                    |               |          |
|                    | <b>HR</b>                           | <b>95% CI</b> | <b>p</b> | <b>HR</b>                              | <b>95% CI</b> | <b>p</b> |
| <b>Aspirin Use</b> |                                     |               |          |                                        |               |          |
| Unadjusted         | 1.26                                | 0.99, 1.61    | 0.06     | 1.38                                   | 0.91, 2.09    | 0.13     |
| Model 1            | 0.85                                | 0.66, 1.09    | 0.19     | 1.05                                   | 0.68, 1.61    | 0.84     |
| Model 2            | 0.80                                | 0.62, 1.04    | 0.10     | 0.88                                   | 0.56, 1.38    | 0.57     |

Model 1 adjusts for sex, race/ethnicity and site. Model 2 adjusts for Model 1 + diabetes, hypertension treatment, cigarette smoking, systolic blood pressure, high-density lipoprotein, total cholesterol, statin use, body mass index, family history of atherosclerotic cardiovascular disease, and C-reactive protein.

**Table S2. First Bleeding Events by Aspirin Use and Lp(a) Level**

|                                       | Aspirin Users            |                          |       | Non-Aspirin Users         |                          |       |
|---------------------------------------|--------------------------|--------------------------|-------|---------------------------|--------------------------|-------|
|                                       | Lp(a) ≤ 50 mg/dL (n=989) | Lp(a) > 50 mg/dL (n=266) | p     | Lp(a) ≤ 50 mg/dL (n=4111) | Lp(a) > 50 mg/dL (n=995) | p     |
| <b>Bleeding Events</b>                | 169 (17.1)               | 54 (20.3)                | 0.224 | 498 (12.1)                | 143 (14.4)               | 0.054 |
| Gastrointestinal bleeding             | 64 (37.9)                | 18 (33.3)                |       | 168 (33.7)                | 58 (40.6)                |       |
| Genitourinary bleeding                | 22 (13.0)                | 8 (14.8)                 |       | 70 (14.1)                 | 21 (14.7)                |       |
| CNS bleeding                          | 9 (5.3)                  | 10 (18.5)                |       | 64 (32.3)                 | 11 (7.7)                 |       |
| Unspecified bleeding                  | 72 (42.6)                | 18 (33.3)                |       | 192 (38.6)                | 53 (37.1)                |       |
| Other bleeding (eye, musculoskeletal) | 2 (1.2)                  | 0 (0.0)                  |       | 4 (0.8)                   | 0 (0.0)                  |       |

Bleeding events by category are presented as total events (% of bleeding events). CNS = central nervous system.
